# Supplementary material for: Vaccine Responses in Adult Hematopoietic Stem Cell Transplant Recipients: A Comprehensive Review
Source: MDPI journal article supplement (doi:10.3390/cancers13236140), 2021-12-06
Supplement: s1 [file s1]

**Table S1.** Search strategy in PubMed.

|                | Determinant 1                       | Determinant 2 |
|----------------|-------------------------------------|---------------|
| Title/abstract | Stem cell transplant<br>HSCT<br>SCT | Vaccin        |
| Mesh-term      | Stem cell transplantation           | Vaccination   |

**Table S2.** Study characteristics and validity of included studies.

| Reference                           | Year | Country        | N   | HSCT      |
|-------------------------------------|------|----------------|-----|-----------|
| Van der Velden et al <sup>31</sup>  | 2005 | Netherlands    | 16  | Auto      |
| Jaffe et al <sup>35</sup>           | 2006 | United States  | 168 | Allo      |
| Van der Velden et al <sup>45</sup>  | 2007 | Netherlands    | 20  | Auto      |
| Avetisyan et al <sup>12</sup>       | 2008 | Sweden         | 14  | Allo      |
| Pao et al <sup>40</sup>             | 2008 | United States  | 76  | Allo      |
| Onozawa et al <sup>33</sup>         | 2008 | Japan          | 13  | Allo      |
| Meerveld-Eggink et al <sup>41</sup> | 2009 | Netherlands    | 26  | Allo      |
| Small et al <sup>30</sup>           | 2009 | United States  | 28  | Auto      |
| Cordonnier et al <sup>29</sup>      | 2009 | France         | 158 | Allo      |
| Yalçın et al <sup>14</sup>          | 2010 | Turkey         | 61  | Allo+auto |
| Issa et al <sup>13</sup>            | 2011 | United States  | 82  | Allo      |
| De Lavallade et al <sup>19</sup>    | 2011 | United Kingdom | 26  | Allo      |
| Mohty et al <sup>18</sup>           | 2011 | Switzerland    | 57  | Allo      |
| Gueller et al <sup>23</sup>         | 2011 | Germany        | 17  | Allo+auto |
| Engelhard et al <sup>24</sup>       | 2011 | Israel         | 78  | Allo+auto |
| Roll et al <sup>17</sup>            | 2012 | Germany        | 38  | Allo      |
| Mariotti et al <sup>15</sup>        | 2012 | Italy          | 15  | Allo      |
| Villa et al <sup>25</sup>           | 2012 | Canada         | 40  | Auto      |
| Karras et al <sup>20</sup>          | 2013 | United States  | 65  | Allo      |
| Dhédin et al <sup>16</sup>          | 2014 | France         | 59  | Allo      |
| Takahata et al <sup>34</sup>        | 2014 | Japan          | 21  | Allo      |
| Shah et al <sup>42</sup>            | 2015 | United States  | 63  | Allo      |
| Cordonnier et al <sup>27</sup>      | 2015 | France         | 162 | Allo      |
| Natori et al <sup>21</sup>          | 2016 | Canada         | 73  | Allo      |
| Halasa et al <sup>22</sup>          | 2016 | United States  | 44  | Allo      |
| Okinaka et al <sup>26</sup>         | 2017 | Japan          | 30  | Allo      |
| Palazzo et al <sup>46</sup>         | 2018 | United States  | 122 | Auto      |
| Cheng et al <sup>32</sup>           | 2018 | United States  | 67  | Allo+auto |
| Langedijk et al <sup>28</sup>       | 2019 | Netherlands    | 103 | Allo      |
| Aoki et al <sup>36</sup>            | 2019 | Japan          | 29  | Allo      |
| Conrad et al <sup>43</sup>          | 2020 | France         | 91  | Allo      |
| Winkler et al <sup>44</sup>         | 2020 | Germany        | 27  | Allo      |
| Camargo et al <sup>38</sup>         | 2020 | United States  | 30  | Allo+auto |
| Stadtmauer et al <sup>39</sup>      | 2021 | United States  | 922 | Auto      |
| Kawamura et al <sup>37</sup>        | 2021 | Japan          | 25  | Allo      |

N = number of vaccinated post-HSCT patients in study population; auto = autologous HSCT recipients; allo = allogeneic HSCT recipients.

**Table S3A.** Cochrane Risk of Bias tool for Randomized Controlled Trials\*.

| Study                          | Randomization process | Deviation from intended intervention | Missing outcome data | Measurement of outcome | Selection of reported result |
|--------------------------------|-----------------------|--------------------------------------|----------------------|------------------------|------------------------------|
| Cordonnier et al <sup>29</sup> | ●                     | ●                                    | ●                    | ●                      | ●                            |
| Villa et al <sup>25</sup>      | ●                     | ●                                    | ●                    | ●                      | ●                            |
| Karras et al <sup>20</sup>     | ●                     | ●                                    | ●                    | ●                      | ●                            |
| Natori et al <sup>21</sup>     | ●                     | ●                                    | ●                    | ●                      | ●                            |
| Halasa et al <sup>22</sup>     | ●                     | ●                                    | ●                    | ●                      | ●                            |
| Stadtmauer et al <sup>39</sup> | ●                     | ●                                    | ●                    | ●                      | ●                            |

● = low risk; ● = moderate risk; ● = serious risk; \*The legend is displayed in supplement table 3C.

Table S3B. Robins-I Risk of Bias tool for Non-randomized Studies of Interventions\*.

| Study                               | Confounding | Selection | Intervention classification | Deviation from intended intervention | Missing data | Measurement of outcome | Selection of reported result |
|-------------------------------------|-------------|-----------|-----------------------------|--------------------------------------|--------------|------------------------|------------------------------|
| Van der Velden et al <sup>31</sup>  | ●           | ●         | ●                           | ●                                    | ●            | ●                      | ●                            |
| Jaffe et al <sup>35</sup>           | ●           | ●         | ●                           | ●                                    | ●            | ●                      | ●                            |
| Van der Velden et al <sup>45</sup>  | ●           | ●         | ●                           | ●                                    | ●            | ●                      | ●                            |
| Avetisyan et al <sup>12</sup>       | ●           | ●         | ●                           | ●                                    | ●            | ●                      | ●                            |
| Pao et al <sup>40</sup>             | ●           | ●         | ●                           | ●                                    | ●            | ●                      | ●                            |
| Onozawa et al <sup>33</sup>         | ●           | ●         | ●                           | ●                                    | ●            | ●                      | ●                            |
| Meerveld-Eggink et al <sup>41</sup> | ●           | ●         | ●                           | ●                                    | ●            | ●                      | ●                            |
| Small et al <sup>30</sup>           | ●           | ●         | ●                           | ●                                    | ●            | ●                      | ●                            |
| Yalçin et al <sup>14</sup>          | ●           | ●         | ●                           | ●                                    | ●            | ●                      | ●                            |
| Issa et al <sup>13</sup>            | ●           | ●         | ●                           | ●                                    | ●            | ●                      | ●                            |
| De Lavallade et al <sup>19</sup>    | ●           | ●         | ●                           | ●                                    | ●            | ●                      | ●                            |
| Mohty et al <sup>18</sup>           | ●           | ●         | ●                           | ●                                    | ●            | ●                      | ●                            |
| Gueller et al <sup>23</sup>         | ●           | ●         | ●                           | ●                                    | ●            | ●                      | ●                            |
| Engelhard et al <sup>24</sup>       | ●           | ●         | ●                           | ●                                    | ●            | ●                      | ●                            |
| Roll et al <sup>17</sup>            | ●           | ●         | ●                           | ●                                    | ●            | ●                      | ●                            |
| Mariotti et al <sup>15</sup>        | ●           | ●         | ●                           | ●                                    | ●            | ●                      | ●                            |
| Dhédin et al <sup>16</sup>          | ●           | ●         | ●                           | ●                                    | ●            | ●                      | ●                            |
| Takahata et al <sup>34</sup>        | ●           | ●         | ●                           | ●                                    | ●            | ●                      | ●                            |
| Shah et al <sup>42</sup>            | ●           | ●         | ●                           | ●                                    | ●            | ●                      | ●                            |
| Cordonnier et al <sup>27</sup>      | ●           | ●         | ●                           | ●                                    | ●            | ●                      | ●                            |
| Okinaka et al <sup>26</sup>         | ●           | ●         | ●                           | ●                                    | ●            | ●                      | ●                            |
| Palazzo et al <sup>46</sup>         | ●           | ●         | ●                           | ●                                    | ●            | ●                      | ●                            |
| Cheng et al <sup>32</sup>           | ●           | ●         | ●                           | ●                                    | ●            | ●                      | ●                            |
| Langedijk et al <sup>28</sup>       | ●           | ●         | ●                           | ●                                    | ●            | ●                      | ●                            |
| Aoki et al <sup>36</sup>            | ●           | ●         | ●                           | ●                                    | ●            | ●                      | ●                            |
| Conrad et al <sup>43</sup>          | ●           | ●         | ●                           | ●                                    | ●            | ●                      | ●                            |
| Winkler et al <sup>44</sup>         | ●           | ●         | ●                           | ●                                    | ●            | ●                      | ●                            |
| Kawamura et al <sup>37</sup>        | ●           | ●         | ●                           | ●                                    | ●            | ●                      | ●                            |
| Camargo et al <sup>38</sup>         | ●           | ●         | ●                           | ●                                    | ●            | ●                      | ●                            |

● = low risk; ● = moderate risk; ● = serious risk; \*The legend is displayed in supplement table 3D.

**Table S3C.** Legend for supplement table 3A (Cochrane Risk of Bias tool for Randomized Controlled Trials).

|                                      |                                                                                                                                                                            |
|--------------------------------------|----------------------------------------------------------------------------------------------------------------------------------------------------------------------------|
| Randomization process                | ● allocation random and concealment guaranteed                                                                                                                             |
|                                      | ● allocation concealment not precisely described or not adequately guaranteed                                                                                              |
|                                      | ● allocation not random or no concealment guaranteed                                                                                                                       |
| Deviation from intended intervention | ● complete population vaccinated according to pre-set schedule or slight deviation from set schedule reported adequately without disturbance of the balance between groups |
|                                      | ● no accurate data on actual moment of vaccination but considered not to be concerning for the outcomes and without disturbance of the balance between groups              |
|                                      | ● deviation from pre-set schedule that is concerning for the outcomes or with disturbance of the balance between groups                                                    |
| Missing outcome data                 | ● no missing data or missing data with properly reported reasoning                                                                                                         |
|                                      | ● missing data without reported reasoning but not concerning for outcomes and balance                                                                                      |
|                                      | ● missing data that is concerning to influence the outcomes or to disturb balance                                                                                          |
| Measurement of outcome               | ● methods clearly described and considered adequate and were equal between groups                                                                                          |
|                                      | ● methods not clearly described but considered adequate and were equal between groups                                                                                      |
|                                      | ● methods considered inadequate or were unequal between groups                                                                                                             |
| Selection of reported result         | ● complete and extensive report of all results according to pre-specified analysis plan                                                                                    |
|                                      | ● reporting of results complete but not (properly) extensive                                                                                                               |
|                                      | ● incomplete reporting of results or not in accordance with pre-specified analysis plan                                                                                    |

**Table S3D.** Legend for supplement table 3B (Robins-I Risk of Bias tool for Non-randomized Studies of Interventions).

|                                      |                                                                                                                              |
|--------------------------------------|------------------------------------------------------------------------------------------------------------------------------|
| Confounding                          | ● pre-vaccination titers available and taken into analysis                                                                   |
|                                      | ● no pre-vaccination titers available but data available on previous vaccination or immune status                            |
|                                      | ● no pre-vaccination titers and no data on previous vaccination or immune status available                                   |
| Selection                            | ● study population representative for target population                                                                      |
|                                      | ● possible selection of patient groups but not concerning                                                                    |
|                                      | ● selection of patient groups that is concerning for the outcomes                                                            |
| Intervention classification          | ● clearly pre-set schedule for vaccinating study population                                                                  |
|                                      | ● schedule for vaccinating study population not clearly set                                                                  |
|                                      | ● no pre-set schedule for vaccinating study population                                                                       |
| Deviation from intended intervention | ● whole study population vaccinated according to the pre-set schedule or deviation from set schedule with adequate reporting |
|                                      | ● no accurate data on actual moment of vaccination but considered not to be concerning for the outcomes                      |
|                                      | ● deviation that is possibly concerning for the outcomes                                                                     |
| Missing data                         | ● no missing data or missing data with properly reported reasoning                                                           |
|                                      | ● missing data without reported reasoning but not concerning for outcomes                                                    |
|                                      | ● missing data that is concerning to influence the outcomes                                                                  |

|                               |   |                                                                                       |
|-------------------------------|---|---------------------------------------------------------------------------------------|
| Measurement of outcome        | ● | methods used for outcome clearly described and considered adequate                    |
|                               | ● | methods used for outcome not clearly described but considered adequate                |
|                               | ● | methods used for outcome considered inadequate                                        |
| Selection of reported results | ● | complete and extensive report of all results according to pre-specified analysis plan |
|                               | ● | reporting of results complete but not (properly) extensive                            |
|                               | ● | incomplete reporting of results or not in accordance with pre-specified analysis plan |

Table S4. Used definitions for response vaccine response per included study.

| Vaccine                       | Definition for response                           |                                                                                                                               | Studies using this definition                                                                                                                                                                        |
|-------------------------------|---------------------------------------------------|-------------------------------------------------------------------------------------------------------------------------------|------------------------------------------------------------------------------------------------------------------------------------------------------------------------------------------------------|
|                               | Seroprotection                                    | Seroconversion                                                                                                                |                                                                                                                                                                                                      |
| Influenza                     | Absolute titer >1:40                              | Pre-vaccination titer ≤ 1:10 and post-vaccination ≥ 1:40 or pre-vaccination > 1:10 and post-vaccination ≥4-fold rise in titer | Villa et al, <sup>25</sup> Gueller et al, <sup>23</sup> Engelhard et al, <sup>24</sup> Roll et al, <sup>17</sup> Mariotti et al, <sup>15</sup> Dhédin et al, <sup>16</sup> Mohty et al <sup>18</sup> |
|                               | Absolute titer ≥1:40                              | Post-vaccination ≥4-fold rise in titer                                                                                        | Karras et al, <sup>20</sup> Natori et al, <sup>21</sup> Halasa et al, <sup>22</sup> Yalçin et al <sup>14</sup>                                                                                       |
|                               | Absolute titer ≥1:40                              |                                                                                                                               | Avetisyan et al, <sup>12</sup> Issa et al <sup>13</sup>                                                                                                                                              |
|                               | Absolute titer ≥1:32                              | Pre-vaccination titer <1:8 and post-vaccination ≥1:32 or pre-vaccination ≥1:8 and post-vaccination ≥4-fold rise in titer      | De Lavallade et al <sup>19</sup>                                                                                                                                                                     |
| Pneumococcus                  |                                                   | ≥2-fold rise in titer and absolute titer ≥0.35 µg/ml for ≥2/3 tested serotypes                                                | Van der Velden et al <sup>45</sup>                                                                                                                                                                   |
|                               | Absolute titer ≥0.35 µg/ml                        | ≥4-fold rise in titer                                                                                                         | Meerveld-Eggink et al, <sup>41</sup> Winkler et al <sup>44</sup>                                                                                                                                     |
|                               | Absolute titer >0.15 µg/ml for all PCV7 serotypes |                                                                                                                               | Cordonnier et al <sup>29</sup>                                                                                                                                                                       |
|                               | Absolute titer ≥0.35 µg/ml                        |                                                                                                                               | Cordonnier et al, <sup>27</sup> Langedijk et al <sup>28</sup>                                                                                                                                        |
|                               |                                                   | ≥3-fold rise in titer for serotypes 14,1 9f and 23f                                                                           | Pao et al, <sup>40</sup> Shah et al <sup>42</sup>                                                                                                                                                    |
|                               |                                                   | ≥2-fold rise in titer                                                                                                         | Okinaka et al <sup>26</sup>                                                                                                                                                                          |
| Diphtheria                    |                                                   | ≥2-fold rise in titer for ≥70% of serotypes                                                                                   | Palazzo et al <sup>46</sup>                                                                                                                                                                          |
|                               |                                                   | ≥4-fold rise in titer                                                                                                         | Small et al <sup>30</sup>                                                                                                                                                                            |
|                               | Absolute titer ≥0.01 IU/ml                        | ≥4-fold rise in titer                                                                                                         | Palazzo et al <sup>46</sup>                                                                                                                                                                          |
|                               | Absolute titer ≥0.1 IU/ml                         | ≥3-fold rise in titer                                                                                                         | Shah et al <sup>42</sup>                                                                                                                                                                             |
|                               | Absolute titer ≥0.1 IU/ml                         | ≥4-fold rise in titer                                                                                                         | Winkler et al <sup>44</sup>                                                                                                                                                                          |
| Tetanus                       |                                                   |                                                                                                                               | Conrad et al <sup>43</sup>                                                                                                                                                                           |
|                               | Absolute titer ≥0.1 IU/ml                         | ≥4-fold rise in titer                                                                                                         | Meerveld-Eggink et al, <sup>41</sup> Winkler et al <sup>44</sup>                                                                                                                                     |
|                               | Absolute titer ≥0.15 IU/ml                        | ≥4-fold rise in titer                                                                                                         | Palazzo et al <sup>46</sup>                                                                                                                                                                          |
|                               |                                                   | ≥4-fold rise in titer                                                                                                         | Small et al <sup>30</sup>                                                                                                                                                                            |
|                               |                                                   | ≥3-fold rise in titer                                                                                                         | Shah et al <sup>40</sup>                                                                                                                                                                             |
| Pertussis                     | Absolute titer ≥0.1 IU/ml                         |                                                                                                                               | Conrad et al <sup>43</sup>                                                                                                                                                                           |
|                               | Absolute titer 0.01 IU/ml                         |                                                                                                                               | Van der Velden et al <sup>45</sup>                                                                                                                                                                   |
|                               |                                                   | ≥2-fold rise in titer                                                                                                         | Small et al, <sup>30</sup> Shah et al <sup>42</sup>                                                                                                                                                  |
| Poliomyelitis                 | Absolute titer ≥ 24 IU/ml                         | ≥4-fold rise in titer                                                                                                         | Winkler et al <sup>44</sup>                                                                                                                                                                          |
|                               | Absolute titer >5 IU/ml                           | Titer increase to >5 IU/ml                                                                                                    | Palazzo et al <sup>46</sup>                                                                                                                                                                          |
|                               | Absolute titer ≥ 10 U/ml                          | ≥4-fold rise in titer and ≥ 100% increase between pre-vaccination and post-vaccination                                        | Winkler et al <sup>44</sup>                                                                                                                                                                          |
| Haemophilus influenzae type b |                                                   | ≥3-fold rise in titer                                                                                                         | Shah et al <sup>42</sup>                                                                                                                                                                             |
|                               | Absolute titer ≥1.0 µg/ml                         |                                                                                                                               | Conrad et al, <sup>43</sup> Van der Velden et al <sup>31</sup>                                                                                                                                       |
|                               | Absolute titer ≥1.0 µg/ml                         | ≥4-fold rise in titer and ≥ 100% increase between pre-vaccination and post-vaccination                                        | Winkler et al <sup>44</sup>                                                                                                                                                                          |

|                                   |                                                                                                                                    |                                                                                                                     |
|-----------------------------------|------------------------------------------------------------------------------------------------------------------------------------|---------------------------------------------------------------------------------------------------------------------|
|                                   | ≥4-fold rise in titer and post-vaccination levels<br>≥6.16 ug/ml                                                                   | Van der Velden et al <sup>45</sup>                                                                                  |
|                                   | Conversion from non-protective (<0.15 ug/ml)<br>to protective (≥1.0 ug/ml) or ≥4-fold rise in ti-<br>ter if in indeterminate range | Palazzo et al <sup>46</sup>                                                                                         |
|                                   | ≥3-fold rise in titer                                                                                                              | Shah et al <sup>42</sup>                                                                                            |
|                                   | Conversion to >1 ug/ml or >3-fold increase ti-<br>ter                                                                              | Pao et al <sup>40</sup>                                                                                             |
|                                   | ≥4-fold rise in titer                                                                                                              | Meerveld-Eggink et al <sup>41</sup>                                                                                 |
| <b>Meningococcus</b>              | <b>Serum Bacterial Activity<br/>(SBA) titers ≥1:8</b>                                                                              | Cheng et al <sup>32</sup>                                                                                           |
| <b>Hepatitis B</b>                | Seroprotection anti-Hbs >10<br>mIU/ml                                                                                              | Onozawa et al, <sup>33</sup> Jaffe et al, <sup>35</sup> Conrad<br>et al, <sup>41</sup> Takahata et al <sup>34</sup> |
|                                   | Seroprotection anti-Hbs >10<br>mIU/ml                                                                                              | Conversion from non-protective to protective<br>Palazzo et al <sup>44</sup>                                         |
| <b>Measles</b>                    | Absolute titer ≥8.0 IU/ml                                                                                                          | Aoki et al <sup>36</sup>                                                                                            |
|                                   | Absolute titer ≥4.0 IU/ml                                                                                                          | Conversion from non-protective to protective<br>Kawamura et al <sup>37</sup>                                        |
| <b>Mumps</b>                      | Absolute titer ≥6.0 IU/ml                                                                                                          | Aoki et al <sup>36</sup>                                                                                            |
|                                   | Absolute titer ≥4.0 IU/ml                                                                                                          | Conversion from non-protective to protective<br>Kawamura et al <sup>37</sup>                                        |
| <b>Rubella</b>                    | Absolute titer ≥8.0 IU/ml                                                                                                          | Aoki et al <sup>36</sup>                                                                                            |
|                                   | Absolute titer ≥4.0 IU/ml                                                                                                          | Conversion from non-protective to protective<br>Kawamura et al <sup>37</sup>                                        |
| <b>Varicella zoster<br/>virus</b> | Conversion from non-protective to protective<br>Or ≥4-fold rise in titer                                                           | Camargo et al, <sup>38</sup> Stadtmauer et al <sup>39</sup>                                                         |

**Table S5.** Suggestions for evaluation of vaccine response in clinical practice. .

| <b>Vaccine</b> | <b>Cut-off value for response</b> |
|----------------|-----------------------------------|
| Pneumococcus   | ≥0.35 ug/ml                       |
| Meningococcus  | ≥1.0 ug/ml                        |
| Hepatitis B    | >10 mIU/ml                        |
| Measles        | ≥0.15 IU/ml                       |
| Tetanus        | ≥0.1 IU/ml                        |
